# Supplementary material for: Dissecting Early Differentially Expressed Genes in a Mixture of Differentiating Embryonic Stem Cells
Source: PLoS Comput Biol. 2009 Dec 18;5(12):e1000607. doi: 10.1371/journal.pcbi.1000607 (PMC2784941; doi:10.1371/journal.pcbi.1000607)

**Text S2: Analysis of differentiation of mouse embryonic stem cells.**

Six biological replicates of 0-day (undifferentiated ES), 4-day EB and 8-day EB were normalized and log2 transformed using dChip software [2].

### Overall relationship between standard deviation and mean. As an exploratory analysis of data quality, we plotted the scatter plot of standard deviation () vs. mean for every gene at each time point and fitted LOWESS (Locally Weighted Scatterplot Smoothing) regression curves [3] (Figure (i) at the end of Text S2). These plots show that is not influenced by the mean expression value. We therefore did not perform variance stabilization normalization to this dataset.

### Variance plots. The variances of 4-day and 8-day EBs were respectively compared to the variance of 0-day ES cells (Figure (ii) at the end of Text S2). More genes with larger variances were found in 4-day and 8-day samples than in 0-day samples, indicating differential expression might be detectable at 4-day and 8-day stages. As a control, the variance of 0-day samples were compared to that of Oct4+ cells (Figure (ii)C). An increased number of genes with larger variances was not observed in either 0-day samples or Oct4+ cells.

**Detected genes.** Table S2 lists the number of Differentiation-Test reported genes under various thresholds. These gene lists consistently had very significant overlaps with the benchmark gene list, by Fisher’s Exact Test (Table S2).

**Transcription regulators ranked by Differentiation-Test.** As a more focused study, we chose transcription regulator genes in the data set according to Gene Ontology annotations, and rank these genes by the values of the Differentiation-Test statistic. Table S3 lists the top ranked transcription regulators with Differentiation-Test applied on 4-day EB vs 0-day ES cells. For comparison purpose, we conducted two sample t-test on 4-day EB vs 0-day ES cells gene expression values of the transcription regulators and the results are shown in Table S3.

**Figure (i):** **Scatter plots of standard deviation vs. mean**. The mean expression value (x-axis) of a gene across replicate samples is plotted against its standard deviation (y-axis). LOWESS regression curves are shown in the scatter plots.


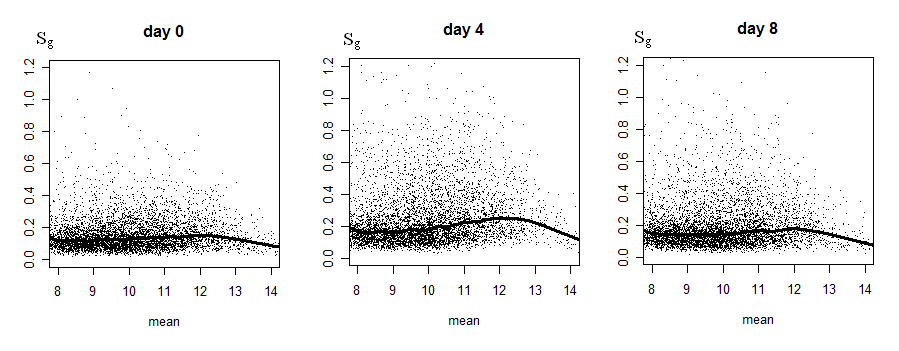


**Figure (ii): Variance comparison.** Each dot represents a transcript, with its x and y axes representing the variances of the microarray measurements of this transcript at different time points. An increased number of genes with larger variances was observed in 4-day (A) and 8-day EBs (B) as compared to in 0-day ES cells. In contrast, a balanced distribution of variances was observed between 0-day ES cells and Oct4-GFP positive sorted cells (C).


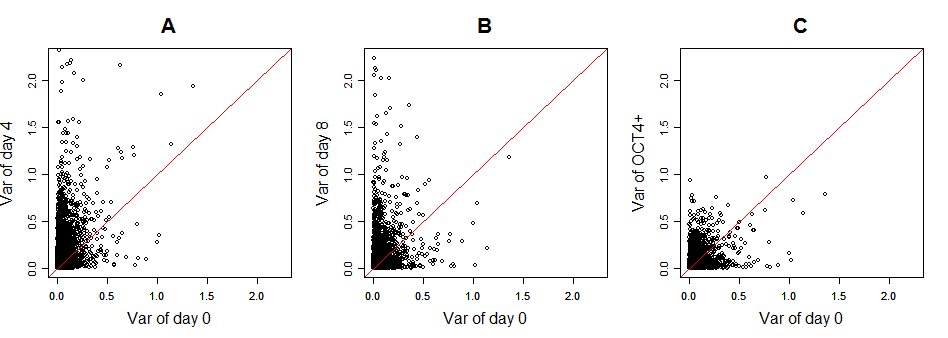

Supplement: Text S2 — Analysis of differentiation of mouse embryonic stem cells (0.05 MB DOC) [file pcbi.1000607.s010.doc]
