# Supplementary material for: Dissecting Early Differentially Expressed Genes in a Mixture of Differentiating Embryonic Stem Cells
Source: PubMed Central journal article supplement (PMC2784941; doi:10.1371/journal.pcbi.1000607), 2009-12-18

## Supplementary Figures

**Figure S1: An illustration of the inter-replicate variations of the average expressions of a gene in a parent population (a) and a mixture of parental and descendent populations (b). The histograms are for the (unobserved) cell level expressions of a gene. Only the averages (red bars) are observed by microarray data. The three biological replicates after differentiation have different mixture proportions of cell types.**

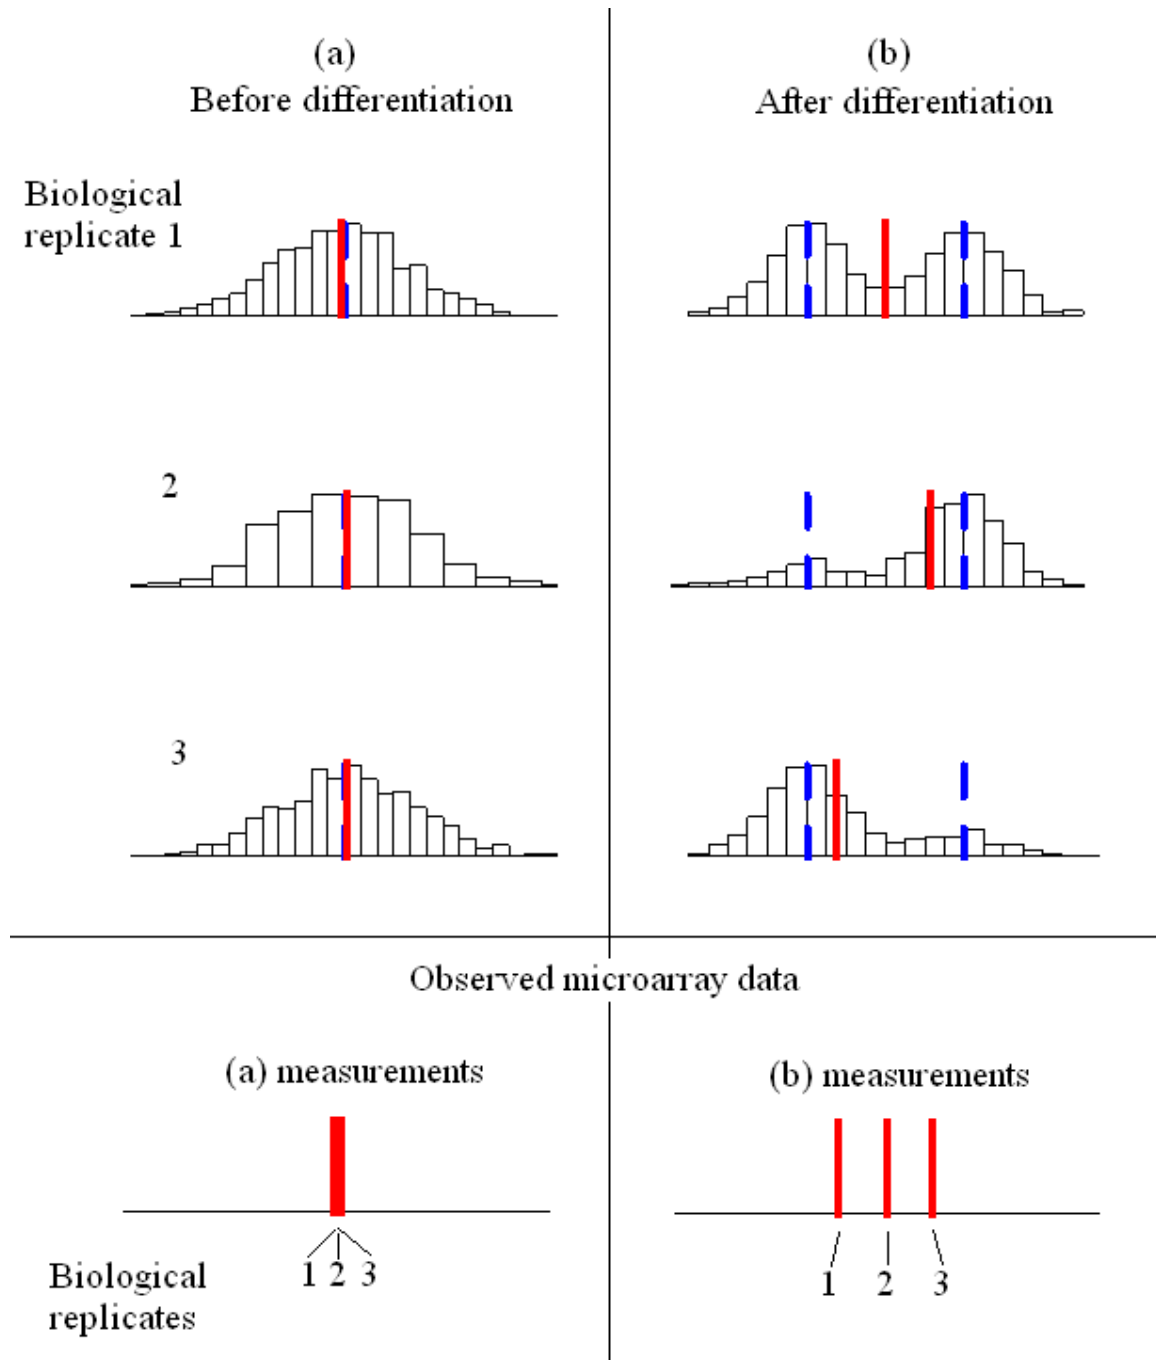

Supplement: pcbi.1000607.s001.pdf [file pcbi.1000607.s001.pdf]
