# Supplementary material for: Dissecting Early Differentially Expressed Genes in a Mixture of Differentiating Embryonic Stem Cells
Source: PubMed Central journal article supplement (PMC2784941; doi:10.1371/journal.pcbi.1000607), 2009-12-18

**Figure S2: Phase contrast micrographs of murine ES cells on gelatin (a) and 8-day EB (b).**

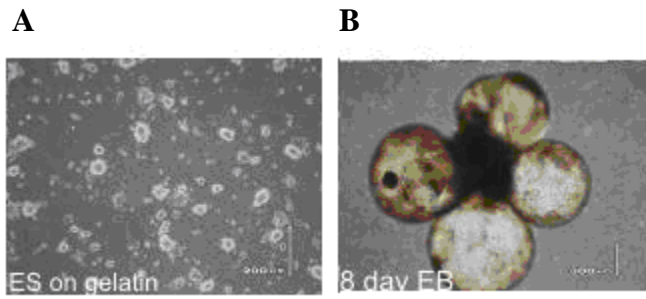

Supplement: pcbi.1000607.s002.pdf [file pcbi.1000607.s002.pdf]
