# Supplementary material for: Dissecting Early Differentially Expressed Genes in a Mixture of Differentiating Embryonic Stem Cells
Source: PubMed Central journal article supplement (PMC2784941; doi:10.1371/journal.pcbi.1000607), 2009-12-18

**Figure S4: ES cells after 4 days of Smarcad1 knockdown.** Three shRNA constructs are used to target different regions of respective transcripts. (A) Four days after puromycin selection, Smarcad1 knockdown cells became more flattened and fibroblast-like, and completely lost the AP positive colony compared with the cells after two days of RNA knockdown (Figure 2). (B) Quantitative real-time PCR analysis of gene expression in four-day knockdown ES cells. The levels of the transcripts were normalized against control empty vector transfection. Data are presented as the mean  $\pm$  SEM and derived from independent experiments.

A

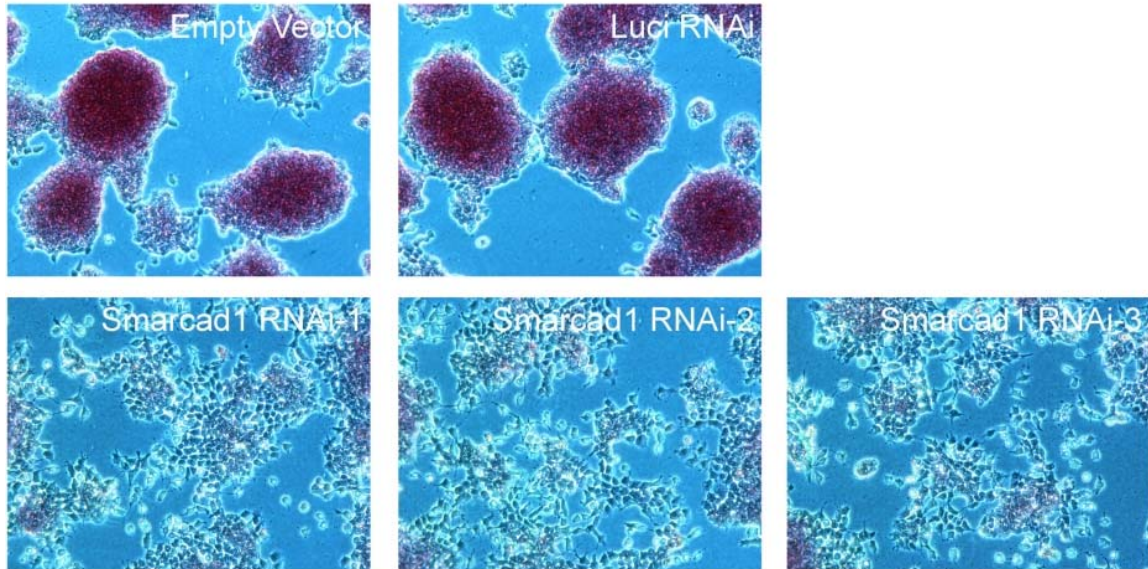

B

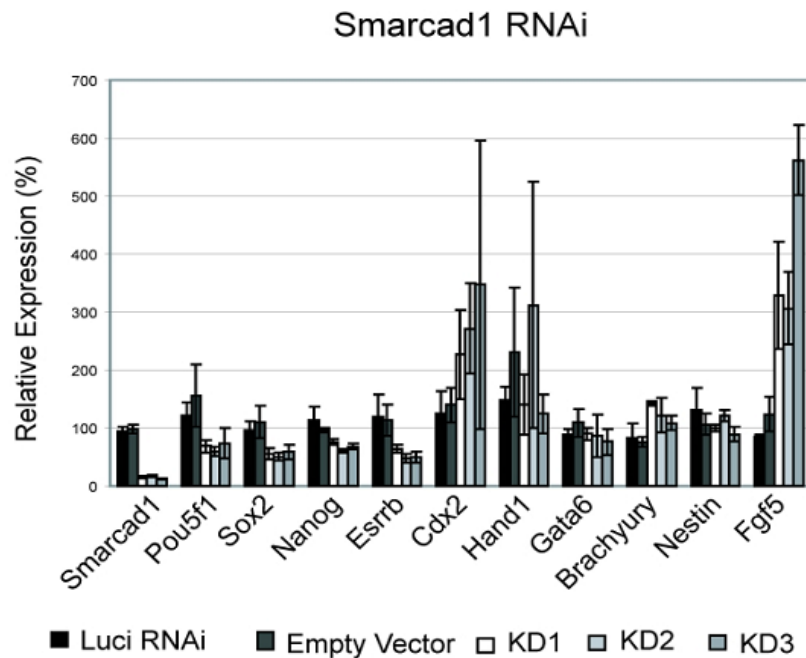

Supplement: pcbi.1000607.s004.pdf [file pcbi.1000607.s004.pdf]
