# Supplementary material for: Dissecting Early Differentially Expressed Genes in a Mixture of Differentiating Embryonic Stem Cells
Source: PubMed Central journal article supplement (PMC2784941; doi:10.1371/journal.pcbi.1000607), 2009-12-18

**Figure S5: Average motif counts.** Average motif counts of RBP-J in the upstreams of the differentiation module are consistently larger than the counts in the upstreams of the pluripotency module.

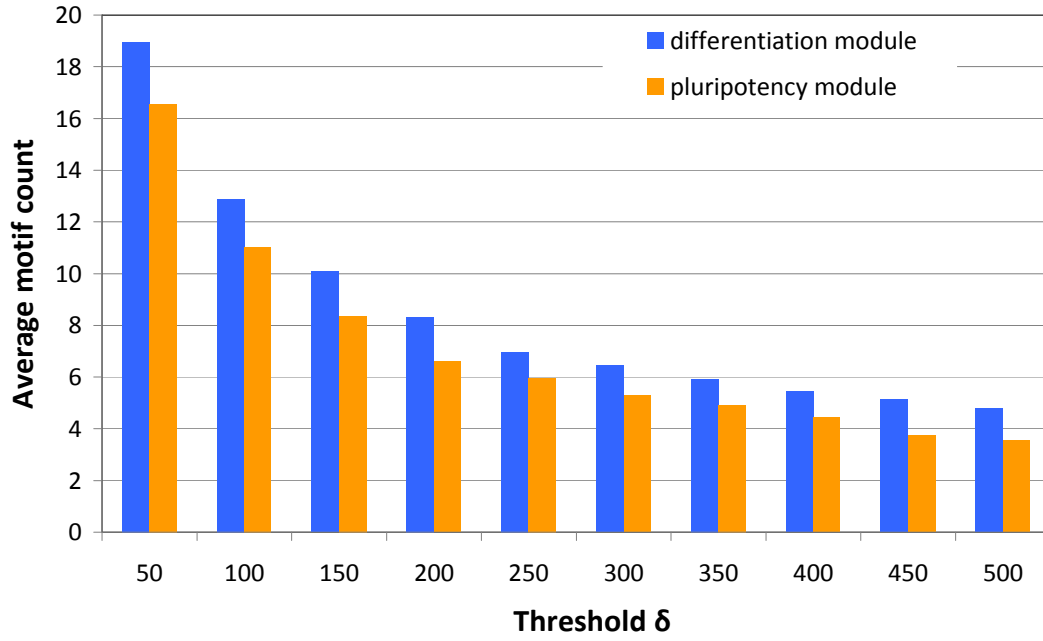

Supplement: pcbi.1000607.s005.pdf [file pcbi.1000607.s005.pdf]
