# Supplementary material for: Dissecting Early Differentially Expressed Genes in a Mixture of Differentiating Embryonic Stem Cells
Source: PubMed Central journal article supplement (PMC2784941; doi:10.1371/journal.pcbi.1000607), 2009-12-18
Supplement: pcbi.1000607.s006.pdf [file pcbi.1000607.s006.pdf]

## Supplementary Tables

**Table S1: Two sample comparison methods.** All these methods require gene expression measurements from individual cell types.

**Table 1**

| <b>Method</b>      | <b>Comment</b>                  | <b>Reference</b> |
|--------------------|---------------------------------|------------------|
| Fold change        |                                 | [1, 2]           |
| T-test             |                                 | [3]              |
| ANOVA              | Multiple samples                | [4-6]            |
| SAM                | Borrow information across genes | [7]              |
| Regularized t-test |                                 | [8]              |
| B statistic        |                                 | [9]              |
| Mixture models     |                                 | [10-13]          |
