# Supplementary material for: Dissecting Early Differentially Expressed Genes in a Mixture of Differentiating Embryonic Stem Cells
Source: PubMed Central journal article supplement (PMC2784941; doi:10.1371/journal.pcbi.1000607), 2009-12-18
Supplement: pcbi.1000607.s007.pdf [file pcbi.1000607.s007.pdf]

**Table S2: Fisher's Exact Tests between top-ranked genes of the Differentiation-Test and benchmark gene list.**

|                       | <b>Day 4</b>              | <b>Day 4</b>   | <b>Day 8</b>              | <b>Day 8</b>   |
|-----------------------|---------------------------|----------------|---------------------------|----------------|
| <b>Reported Genes</b> | <b>Number of overlaps</b> | <b>p-value</b> | <b>Number of overlaps</b> | <b>p-value</b> |
| top 100               | 23                        | 1.4E-03        | 31                        | 3.2E-07        |
| top 200               | 52                        | 3.8E-08        | 55                        | 1.7E-09        |
| top 300               | 70                        | 2.5E-08        | 77                        | 4.0E-11        |
| top 400               | 85                        | 8.1E-08        | 99                        | 6.4E-13        |
| top 500               | 102                       | 3.6E-08        | 120                       | 2.1E-14        |
| top 600               | 120                       | 7.0E-09        | 140                       | 1.3E-15        |
| top 700               | 133                       | 2.8E-08        | 158                       | 3.2E-16        |
| top 800               | 146                       | 8.2E-08        | 179                       | 4.0E-18        |
| top 900               | 158                       | 3.1E-07        | 194                       | 8.8E-18        |
| top 1000              | 174                       | 1.3E-07        | 210                       | 6.8E-18        |
